# Supplementary material for: Assessing life cycle impacts from changes in agricultural practices of crop production
Source: Springer Nature journal article supplement (doi:10.1007/s11367-020-01767-z), 2020-08-17
Supplement: MOESM1 [file 18290092]

Electronic supplementary material (ESM 1) for

**Assessing life cycle impacts from changes in agricultural practices of crop production**Methodological description and case study of microbial phosphate inoculant

Jesper Hedal Kløverpris a,*, Claus Nordstrøm Scheela,b, Jannick Schmidtc, Brian Grantd, Ward Smithd, Murray J. Benthame

a Novozymes A/S, 2880 Bagsværd, Denmark

b Technical University of Denmark, Anker Engelunds Vej 1, DK-2800 Kgs. Lyngby, Denmark

c Aalborg University, Department of Planning, Rendsburggade 14, room 1.431, 9000 Aalborg, Denmark

d Ottawa Research and Development Centre, Agriculture and Agri-Food Canada, Ottawa, Ontario, Canada K1A 0C6

e Department of Soil Science, College of Agriculture and Bioresources, University of Saskatchewan, Saskatoon SK S7N 5A8, Canada

* Correspondence: jklp@novozymes.com, Tel: +45 30770263

The present document supplements the research paper with the above title. The document is structured as follows.

S1 Special case: Alternative practice applied to a crop grown in rotation with another crop

S2 Characterization factors for the time-independent approach for SOC modeling

S3 Description of the downstream effect

S4 Case study – additional results

S4.1 Base case results for continuous corn per hectare treated

S4.1.1 Estimate of indirect N2O emissionsS4.2 Advanced methods for continuous corn in Minnesota

S4.2.1 Field effect with SOC-related CO2 emissions based on time-independent approach (TIA) S4.2.2 Yield effect based on ILUC modeling

S4.2.3 Advanced methods: Total effects

S4.3 Case study: Corn grown in rotation with soybeans

S1 Special case: Alternative practice applied to a crop grown in rotation with another crop

Rotational cropping systems are common in agriculture. From an LCA point-of-view, these are more complex systems than single-crop systems since they are integrated systems producing two functional outputs, although not at the same time. This extension of the proposed methodological approach considers a situation where a change is introduced in the production of one crop (*c1*), which is produced in rotation with another crop (*c2*) on the area *A* (see Figure S1). For simplicity, it is assumed that the two crops are grown in sequence year on year, i.e. crop 1 is produced in year 1 and crop 2 is produced in year 2 and then the rotation starts over again. In priciple, the two crops could also be grown in rotation within the same year (depending on climate, etc.). While the studied change in practice may impact the output of crop 1 from the area *A* by the change ΔQ, the output of crop 2 is assumed to be unaffected.

As consequential LCA is focused on changes (relative to a reference system), the inputs to production of the crop in year 2 and the output from it will cancel out when calculating the difference between the two systems. However, the field emissions (throughout the full crop rotation) will not necessarily be the same in the two systems due to the change in the agricultural practice in year 1, which might affect the soil dynamics in year 2. This potential difference in field emissions (throughout the full crop rotation) can be estimated through biogeochemical modeling and thereby the field effect can be related to the change in practice in year 1 (the cause of the change in field emissions during the full crop cycle). Note that the production of the crop in year 2 is only included in the analysis to account for the full field effect from introducing the change in year 1. The inclusion is necessary to allow for biogeochemical modeling throughout the full crop cycle.

The upstream effect, yield effect, and downstream effect will remain unchanged for a crop grown in rotation with another. Hence, the relevant equations (1, 3 and S3) from the single crop methodology can be applied. For the field effect, a slight modification of Equation 2 is required: The emissions and must represent the full crop rotation (year 1 and year 2). This should be average soil emissions from the crop rotation as modeled with the applied biogeochemical model with a modeling period sufficiently long to generate representative results. As with a single crop system, CO2 emissions from changes in SOC need special treatment, cf. discussion in Section 2.2. In relation to Figure S1, the crop from year 1 (*c*) changes name to crop 1 (*c1*), whereas the notation in Equation 7 and 8 is updated as shown in Equation S1 and S2 (below Figure S1).


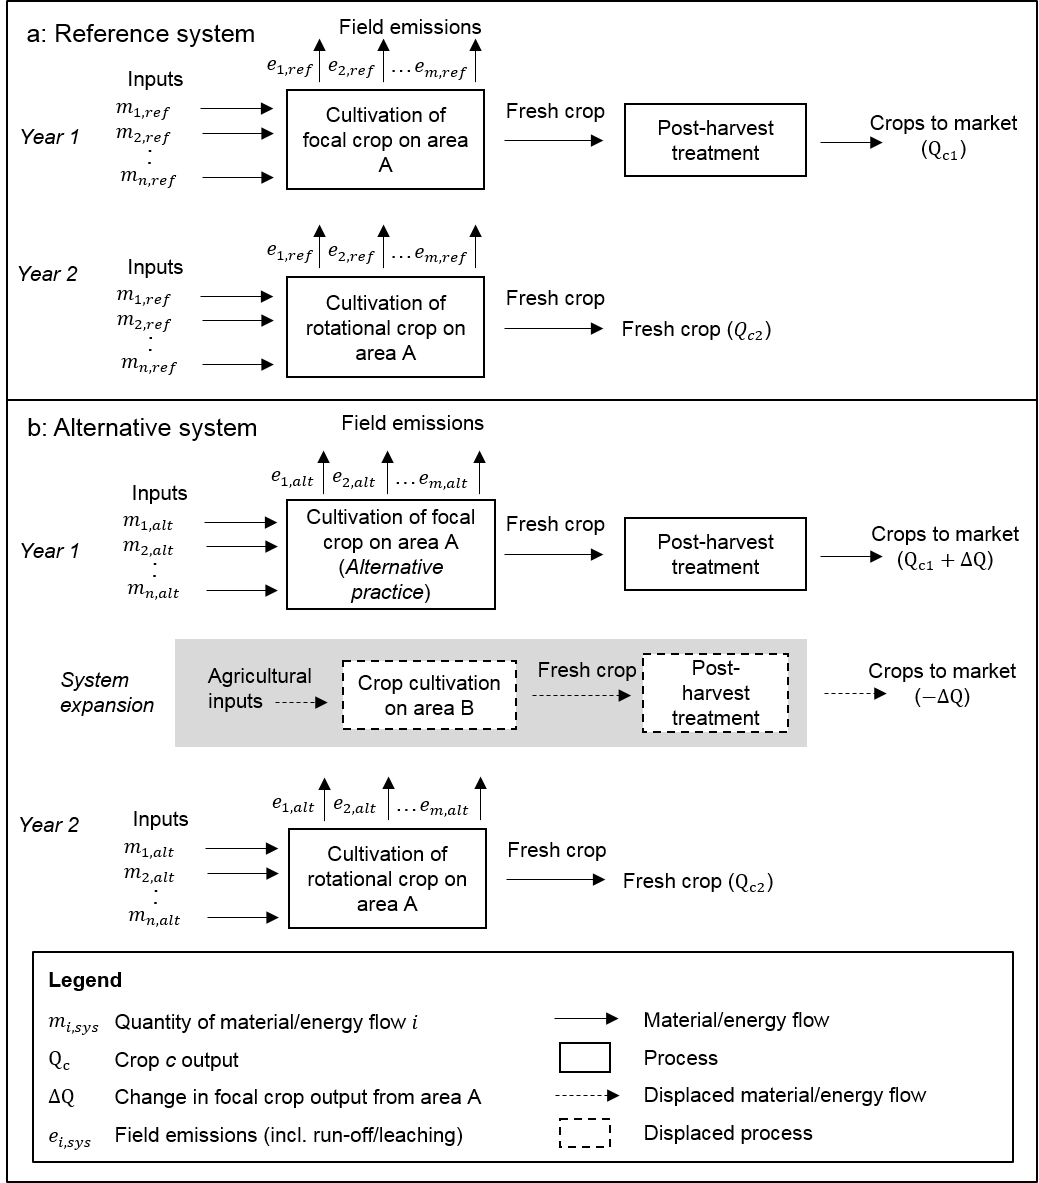


**Figure S1: Illustration of the reference system and the alternative system where an alternative practice is introduced for one of two crops grown in rotation (with no impact on yield of the second crop).**

( S1 )

where

- is the change in life cycle impact per unit of the crop *c1* from the reference system to the alternative system in impact category *j*

- is the total effect of the shift in practice in impact category *j*

- is the reference output of crop 1

( S2 )

where

- is the relative change in life cycle impact of the crop *c1* from the reference system to the alternative system

- is the life cycle impact of the crop *c1* produced in the reference system

S2 Characterization factors for the time-independent approach for SOC modeling

# The time dependent characterization factors are calculated based on the IPCC global warming potential (IPCC 2013a,b). The approach has previously been described in e.g. Schmidt and Brandão (2013), Kløverpris et al. (2013) and Schmidt et al. (2015).

According to IPCC (2013b), the global warming potential (GWP) is defined as:

( A )

where:

H is the time horizon;

AGWP is the absolute global warming potential in units W m-2 yr kg-1;

RFi is the radiative forcing (W m-2 yr kg-1) due to a pulse emission of a gas *i*.

In the current paper, characterization factors are denoted for emission type *i* and impact category *j*. Hence, GWPi corresponds to *Pi,gw.*The GWP (Equation A) was originally designed for introducing a weighting between different GHG-emissions, and it is expressed relative to the accumulated radiative forcing for CO2 over a time horizon (H) of typically 100 years.

However, the same principle can be used to differentiate between CO2 emissions emitted at different times, where the GWP then expresses the accumulated radiative forcing of 1 kg CO2 emitted at time t after t0, relative to 1 kg CO2 emission emitted at time t0 = 0. t0 is a defined baseline year (0) to which the timing of CO2 emissions is compared. Hence, Equation A can be modified to the following as shown by Schmidt et al. (2015):

( B )

where:

t0 = 0 refers to the baseline year to which the timing of CO2 emissions is compared;

t refers to the time for the emission of the considered CO2 relative to t0

GWPCO2,t is the global warming potential for a CO2 emission emitted t years after t0.

Since the radiative forcing (RF) in Equation B concerns the same emission in both the nominator and denominator, this is proportional with the fraction (R) of the greenhouse gas remaining in the atmosphere after the emission. For CO2, this fraction (RCO2) can be approximated with Equation C (IPCC 2013b):

( C )

The table (S1) below provides the time-dependent GWP(100), i.e. characterization factors for CO2 emitted at different times (t) after t0.

Table S1: Overview of time-dependent characterization factors for CO2 emitted t time after t0

| Time of emission t  (years) | GWP100(t)  (kg CO2-eq/kg CO2) | Time of emission t  (years) | GWP100(t)  (kg CO2-eq/kg CO2) |
| --- | --- | --- | --- |
| 0 | 1.000 | 51 | 0.416 |
| 1 | 0.981 | 52 | 0.406 |
| 2 | 0.964 | 53 | 0.397 |
| 3 | 0.947 | 54 | 0.388 |
| 4 | 0.931 | 55 | 0.379 |
| 5 | 0.916 | 56 | 0.370 |
| 6 | 0.902 | 57 | 0.361 |
| 7 | 0.887 | 58 | 0.353 |
| 8 | 0.874 | 59 | 0.344 |
| 9 | 0.860 | 60 | 0.335 |
| 10 | 0.847 | 61 | 0.326 |
| 11 | 0.835 | 62 | 0.318 |
| 12 | 0.822 | 63 | 0.309 |
| 13 | 0.810 | 64 | 0.300 |
| 14 | 0.798 | 65 | 0.292 |
| 15 | 0.786 | 66 | 0.283 |
| 16 | 0.774 | 67 | 0.274 |
| 17 | 0.762 | 68 | 0.266 |
| 18 | 0.751 | 69 | 0.257 |
| 19 | 0.739 | 70 | 0.249 |
| 20 | 0.728 | 71 | 0.241 |
| 21 | 0.716 | 72 | 0.232 |
| 22 | 0.705 | 73 | 0.224 |
| 23 | 0.694 | 74 | 0.216 |
| 24 | 0.683 | 75 | 0.207 |
| 25 | 0.673 | 76 | 0.199 |
| 26 | 0.662 | 77 | 0.191 |
| 27 | 0.651 | 78 | 0.183 |
| 28 | 0.641 | 79 | 0.174 |
| 29 | 0.630 | 80 | 0.166 |
| 30 | 0.620 | 81 | 0.158 |
| 31 | 0.609 | 82 | 0.150 |
| 32 | 0.599 | 83 | 0.142 |
| 33 | 0.589 | 84 | 0.134 |
| 34 | 0.579 | 85 | 0.126 |
| 35 | 0.569 | 86 | 0.118 |
| 36 | 0.559 | 87 | 0.110 |
| 37 | 0.549 | 88 | 0.102 |
| 38 | 0.539 | 89 | 0.094 |
| 39 | 0.529 | 90 | 0.086 |
| 40 | 0.519 | 91 | 0.078 |
| 41 | 0.509 | 92 | 0.070 |
| 42 | 0.500 | 93 | 0.062 |
| 43 | 0.490 | 94 | 0.054 |
| 44 | 0.481 | 95 | 0.047 |
| 45 | 0.471 | 96 | 0.039 |
| 46 | 0.462 | 97 | 0.031 |
| 47 | 0.453 | 98 | 0.023 |
| 48 | 0.443 | 99 | 0.015 |
| 49 | 0.434 | 100 | 0.008 |
| 50 | 0.425 |

S3 Description of the downstream effect

Changes in agricultural practices can impact the required processing of crops after harvest (‘post-treatment’). For instance, the moisture content of the specific crops grown in the studied agricultural system can potentially change. This would impact the fuel required to transport the crop from field to farm and it could also impact the drying required to reach the required moisture content before the crops are sold on the market. Such impacts will be referred to as the ‘downstream effect’. Figure S2 illustrates the inputs to post-treatment in the reference system and in the alternative system. It is the potential difference in the collective inputs between the two systems that causes the downstream effect.


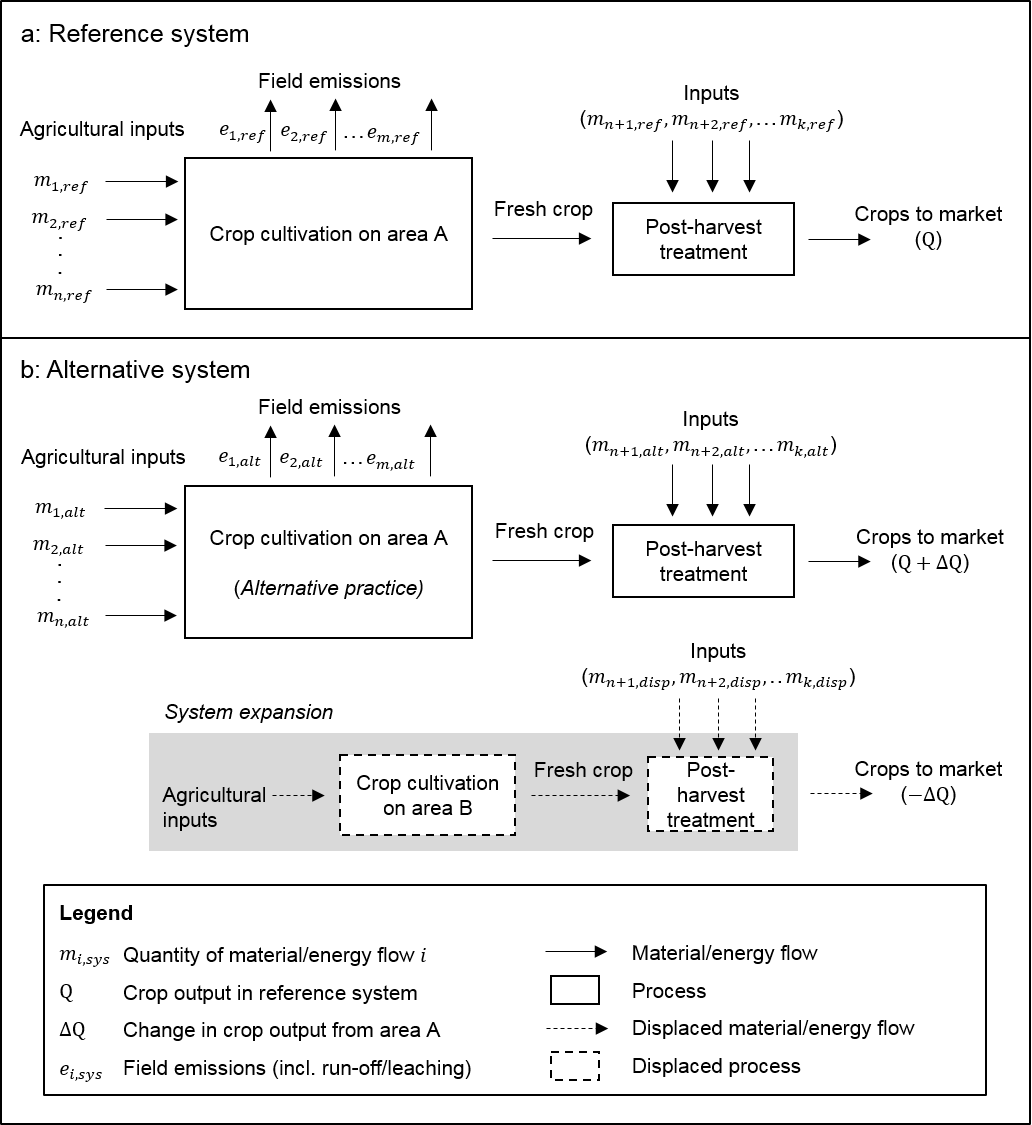


# Figure S2: Illustration of the reference system and the alternative system producing the same functional output (Q) with different environmental impacts – including inputs to post treatment. The index *sys* refers to either the reference system (*ref*), the alternative system (*alt*) or the displaced system (*disp*) included in the alternative system.

# Based on the symbols used in Fig. S2, the downstream effects can be quantified by use of Equation S3:

( S3 )

# where

# - is the downstream effect for impact category *j*

# - is the quantity of input *i* to the post-treatment of fresh crop from the area *A* in the alternative system

# - is the quantity of input *i* to the post-treatment of fresh crop from the area *B* in the alternative system

# - is the quantity of input *i* to the post-treatment of fresh crop in the reference system

# - is the specific life cycle impact for the impact category *j* for one unit of the input

- *(k – n)* is the total number of inputs to post-treatment

S4 Case study – additional results

S4.1 Base case results for continuous corn per hectare treated

Table S2: Base case impacts for continuous corn per hectare treated (simple system expansion and 20-year annualization of changes in SOC)

| Impact category | Unit | Upstream effect | Field effect | Yield effect | Total | Relative |
| --- | --- | --- | --- | --- | --- | --- |
| Fossil energy resources | MJ LHV | 3.4 | 0 | -870 | -870 | -4% |
| Global warming | kg CO2e | 0.4 | -250 | -140 | -390 | -14% |
| Photochemical oxidation | g C2H4e | 0.1 | 0 | -19 | -19 | -3% |
| Acidification | g SO2e | 2.0 | 290 | -1300 | -1000 | -3% |
| Nutrient enrichment | g PO43-e | 0.6 | -3400 | -1500 | -4900 | -13% |
| Land occupation | m2a | 0.1 | 0 | -270 | -270 | -3% |

S4.1.1 Estimate of indirect N2O emissions

The original case study in ESM 2 failed to include indirect emissions of N2O from leaching and volatilization. This section estimates the impact of indirect N2O on results for the global warming impact category.

Results for leaching of nitrate and volatilization of ammonia can be found in Table 3. These results have been converted to N losses in Table S3. By use of default emissions factors from IPCC (2019), estimates of total indirect N2O emissions have been derived (Table S3).

Table S3: Estimates of indirect N2O emissions from the area A (defined as one hectare)

| Process | Substance | Loss of substance (kg) | | N content of substance | Loss of N (kg) | | EF§ | Indirect N2O emissions  (kg) | | |
| --- | --- | --- | --- | --- | --- | --- | --- | --- | --- | --- |
| Ref.† | + *P.b.*‡ | Ref.† | + *P.b.* ‡ | Ref.† | + *P.b.*‡ | Dif. |
| Volatilization | Ammonia | 7.2 | 7.6 | 82% | 5.9 | 6.3 | 1.0% | 0.093 | 0.098 | 0.005 |
| Leaching | Nitrate | 173 | 139 | 23% | 39.0 | 31.4 | 1.1% | 0.675 | 0.543 | -0.132 |
| Total |  |  |  |  | 45.0 | 37.7 |  | 0.768 | 0.641 | -0.127 |
| † Reference system without the use of *P. bilaiae*  ‡ System with use of *P. bilaiae* on corn  § Emission Factor: Fraction of N loss emitted as N2O, aggregated default values suggested by IPCC (2019) | | | | | | | | | | |

Based on Equation 2, the field effect for global warming related to indirect N2O emissions can be estimated as follows.

The total effect for global warming (without consideration of indirect N2O emissions) is -387 kg CO2e in the base case (cf. Section 3.5). Hence, the inclusion of indirect N2O emissions would increase the estimated total global warming effect by 10% (in numeric terms). This shows that indirect N2O emissions can be large enough to influence the total global warming effect but, in this case, they are not large enough to influence the overall conclusions of the inoculant LCA study.

To ensure consistency between the LCA report (ESM 2) and the case study section of the main manuscript (Section 3), the impact from indirect N2O emissions has not been included in the estimate of the total global warming effect. Note that this leads to a conservative estimate of the benefits of the phosphate inoculant.

S4.2 Advanced methods for continuous corn in Minnesota

S4.2.1 Field effect with SOC-related CO2 emissions based on time-independent approach (TIA)

Based on the approach described in Section 2.2.2, the SOC-related global warming impact of applying the *P.b.* inoculant once on the area A was estimated in terms of GWP100. This was achieved by modeling one year of corn production with the *P.b.* inoculant followed by 99 years of conventional corn production (no inoculant) in the DayCent Model. One hundred years of conventional corn production was modeled as the reference. On this basis, the difference in SOC (on the area *A*) in the reference system and the alternative system was calculated for each year in the modeling period (100 years). R statistical software (R Core Team 2013) was used to apply a best-fit model using an exponential decay function similar to the one used by VandenBygaart et al. (2008). Thereby, a more representative time sequence of differences in the SOC between the area *A* in the two systems was established. These differences in SOC were converted (stoichiometrically) to corresponding annual differences in CO2 emissions, which were then multiplied with their corresponding time-dependent characterization factors as described in Section 2.2.2. By summing up contributions from all years in the accounting period, () in Equation 2 was estimated at -129 kg CO2e for each year of corn production on the area *A* (defined as one hectare). Additional detail is available in Section 6.3 and Appendix C in ESM 2.

Based on the time-independent SOC approach, the field effect for global warming can be derived via Equation 2 as follows:

As shown, the numeric value of the field effect for global warming is reduced (~20%) when using the time-independent SOC approach as compared to the 20-year annualization method (-254 kg CO2e).

S4.2.2 Yield effect based on ILUC modeling

As discussed in Section 2.3.3, the yield effect can also be estimated via ILUC modeling with the purpose of addressing the market-mediated impacts of a change in output (*ΔQ*) from the area *A*. In the present case study, an ILUC model by Schmidt et al. (2015) was applied. This ILUC model allows for exploration of both option 1 and option 2 for assessment of the yield effect because the model includes intensification and assumes a fully elastic (long-term) response to changes in demand and supply (cf. Section 2.3.3 and 2.3.4). According to the model, the occupation of one hectare of cropland in Minnesota generates a global warming impact of 2050 kg CO2e.

Using ILUC option 1 (Section 2.3.3), the field effect for global warming can be estimated as follows (based on Equation 4) where equals 2050 kg CO2e and the effective duration of the crop cycle (*T*) is one year.

The result indicates that the additional output from one hectare of corn in Minnesota would reduce greenhouse gas emissions elsewhere through reduced land conversion and reduced intensity.

Secondly, the implications of using ILUC option 2 was explored. As a starting point, the area *B* was estimated to determine the land occupation associated with displaced production of conventional corn. Since the reference yield on the area *A* (10.7 Mg ha-1) is assumed to be the same as the yield on the area *B* (cf. Section 2.3.1), *B* can be estimated as follows[[1]](#footnote-2).

With above-mentioned crop cycle of one year, the land occupation of the displaced corn is -411 m2y. Based on the ILUC model by Schmidt et al. (2015), is equal to 2050 kg CO2e (same as because the areas *A* and *B* are assumed to be in the same region). Using ILUC option 2 with simple system expansion (Section 2.3.4), the field effect for global warming can thereby be estimated as follows (based on Equation 5).

This result is substantially higher than the result obtained with option 1, which is due to a different interpretation of system dynamics. Whereas option 1 assumes a direct market response from the yield change on the area *A*, option 2 assumes that adjacent corn production is first displaced (simple system expansion) and then this has an indirect impact. The present paper will leave room for both interpretations.

S4.2.3 Advanced methods: Total effects

The calculations below show how the total effect for global warming can be estimated via the advanced methods discussed above (using Equation 6 in the main paper).

Using Equation 7, the total effect can be related to the production of 1 ton of corn.

S4.3 Case study: Corn grown in rotation with soybeans

An example of how the suggested approach can be applied to one crop grown in rotation with another is outlined in present section, which considers the use of the *P.b.* inoculant on corn in a corn-soybean rotation. The output of soybeans from the area *A* was unchanged when *P. bilaiae* was applied to corn. Both agricultural inputs to soybeans (grown every second year) on the area *A* and the output of soybeans from *A* remained unchanged. Only the field emissions and nutrient flows in soybean production were different between the reference and the alternative system due to the use of *P. bilaiae* on corn. This was simulated with the biogeochemical model DayCent. Results are shown in Table S4.

Table S4: Average crop production and emissions during one corn-soybean rotation (two years) in Minnesota based on DayCent (average based on a modeled 40-year time horizon, unless otherwise noted)

|  |  | Unit | Ref.† | *P.b.*‡ |
| --- | --- | --- | --- | --- |
| Crop | Corn production§ | Mg ha-1 | 10.7 | 11.1 |
|  | Soybean production¶ | Mg ha-1 | 2.7 | 2.7 |
| Emissions | Ammonia | kg NH3 ha-1 | 17.9 | 18.1 |
| to air | Nitrous oxide | kg N2O ha-1 | 7.6 | 7.4 |
|  | Nitric oxide | kg NO∙ ha-1 | 20.1 | 19.6 |
|  | Carbon dioxide# | Mg CO2 ha-1 | 2.3 | 2.0 |
| Losses | Phosphorus | kg P ha-1 | 0 | 0 |
| to water | Nitrate | kg NO3- ha-1 | 227 | 208 |
| † Reference system without the use of *P. bilaiae*  ‡ System with use of *P. bilaiae* on corn  § Yields are given in equivalents of dried corn, i.e. with a moisture content of 14%  ¶ Soybean yields equivalent to a 13% moisture content  # From change in SOC (soil organic carbon) with annual emissions based on average of first 20 years | | | | | |

To estimate the field effect (in the global warming impact category) Equation 2 has been used with inputs from Table S4. Note that the net-methane emissions are negligible despite methane global warming impact:

Adding the 3 other effects (same quantities and procedure as described in Sections 3.1 and 3.3.1) the total effect is calculated with Equation 6:

Using Equation S1 the total effect was related to the functional unit of 1 Mg corn.

Due to an increase in carbon sequestration (the SOC level) and the yield effect of the corn production (Section 3.3) the savings using *P. bilaiae* on corn grown after soybeans were -39 kg CO2e Mg-1 corn.Applying Equation S2 assuming a global warming impact of conventional corn of roughly 260 kg CO2e Mg-1 (see Table 8 in ESM 2) the relative change in impact is found:

References

IPCC (2006) IPCC Guidelines for National Greenhouse Gas Inventories. Online at http://www.ipcc-nggip.iges.or.jp/public/2006gl/index.html

IPCC (2013a). Climate Change 2013 - The Physical Science Basis. (pages 710-731)

IPCC (2013b). Climate Change 2013 - The Physical Science Basis - Supplementary Material. (pages 78SM-14 - 8SM17)

Kløverpris J, Mueller S (2013). Baseline time accounting e considering global land use dynamics when estimating the climate impact of indirect land-use change caused by biofuels. Int. J. Life Cycle Assess. 18, 319-330.

Kløverpris J, Wenzel H, Nielsen PH (2008) Life cycle inventory modeling of land use induced by crop consumption. Part 1: Conceptual analysis and methodological proposal. Int J Life Cycle Assess 13:13–21

Petersen B M, Knudsen M T, Hermansen J E and Halberg N. (2013). An approach to include soil carbon changes in life cycle assessments. Journal of Cleaner Production, 52: 217–24

R Core Team (2013). R: A language and environment for statistical computing. R Foundation for statistical Computing, Vienna, Austria. URL: http://www.R-project.org/.

Schmidt J, Brandão M (2013). LCA screening of biofuels – iLUC, biomass manipulation and soil carbon. This report is an appendix to a report published by the Danish green think tank CONCITO on the climate effects from biofuels: Klimapåvirkningen fra biomasse og andre energikilder, Hovedrapport (in Danish only). CONCITO, Copenhagen. <http://lca-net.com/p/227>

Schmidt J, Weidema B P, Brandão M (2015). A framework for modelling indirect land use changes in life cycle assessment. Journal of Cleaner Production 99:230‑238.

VandenBygaart A. J., McConkey B. G., Angers D.A., Smith W., de Gooijer H., Bentham M., Martin T. (2008) Soil carbon change factors for the Canadian agriculture national greenhouse gas inventory, Canadian Journal of Soil Science, 88(5):671-680. <https://doi.org/10.4141/CJSS07015>

1. Further justification available in Section 2.2.6.1 in ESM 2. [↑](#footnote-ref-2)
